# Supplementary material for: Encoding of speech in convolutional layers and the brain stem based on language experience
Source: PubMed Central journal article supplement (PMC10119295; doi:10.1038/s41598-023-33384-9), 2023-04-20
Supplement: 41598_2023_33384_MOESM1_ESM.pdf [file 41598_2023_33384_MOESM1_ESM.pdf]

# Supplementary Materials to *Encoding of speech in convolutional layers and the brain stem based on language experience*

Gašper Beguš<sup>1,\*</sup>, Alan Zhou<sup>1</sup>, and T. Christina Zhao<sup>2,3</sup>

<sup>1</sup>Department of Linguistics, University of California, Berkeley, United States

<sup>2</sup>Institute for Learning and Brain Sciences, University of Washington, United States

<sup>3</sup>Department of Speech and Hearing Sciences, University of Washington, United States

\*begus@berkeley.edu

## 1 Supplementary Materials: Methods

### 1.1 Data analysis

All spectrograms are created in Praat<sup>1</sup> and imported into ggplot2 via a script by Matthew Winn. Peak timing was extracted with a modified script from <https://stackoverflow.com/questions/48138899>.

### 1.2 Model Architecture

| Generator    |                   | Discriminator   |                   |
|--------------|-------------------|-----------------|-------------------|
| Layer        | Dimension         | Layer           | Dimension         |
| $z$          | $100 \times 1$    | input           | $16384 \times 1$  |
| fc + reshape | $16 \times 1024$  | conv0           | $4096 \times 64$  |
| upconv0      | $64 \times 512$   | conv1           | $1024 \times 128$ |
| upconv1      | $256 \times 256$  | conv2           | $256 \times 256$  |
| upconv2      | $1024 \times 128$ | conv3           | $64 \times 512$   |
| upconv3      | $4096 \times 64$  | conv4           | $16 \times 1024$  |
| upconv4      | $16384 \times 1$  | flatten + logit | $1 \times 1$      |

**Table S1.** Dimensionality of WaveGAN<sup>2</sup>, the deep neural network examined for this experiment. Given a 100-dimensional random vector  $z$  as input, the Generator first applies a fully connected layer and reshapes the output into a 2D matrix, before applying a series of transpose convolutional layers to upsample the input into a 16834-length vector corresponding to audio. The Discriminator takes on almost a mirror architecture to the Generator, passing a 16834-length vector through a series of traditional convolutions to downsample the input, before flattening and passing the output through a fully connected layer to get the final Discriminator score.

### 1.3 GAMMs

| A. parametric coefficients | Estimate | Std. Error | t-value  | p-value  |
|----------------------------|----------|------------|----------|----------|
| (Intercept) = English      | 0.1164   | 0.0189     | 6.1428   | < 0.0001 |
| LANGUAGE = Spanish         | -0.0247  | 0.0263     | -0.9388  | 0.3486   |
| B. smooth terms            | edf      | Ref.df     | F-value  | p-value  |
| s(Time)                    | 6.1901   | 6.4494     | 9.2226   | < 0.0001 |
| s(Time):LANGUAGE = Spanish | 5.7023   | 5.9856     | 2.6980   | 0.0147   |
| s(Time, Subject)           | 243.4468 | 259.0000   | 205.5821 | < 0.0001 |

**Table S2.** Estimates of a generalized additive mixed model (fitted with the *bam()* function in the *mgcv* package by<sup>3</sup>). Amplitude in  $\mu\text{V}$  from the EEG-cABR data is the dependent variable. The independent variables include LANGUAGE as a parametric predictor (with two levels, English and Spanish with English treatment-coded as the reference level), smooth for Time, by-Language difference smooth for time, and by-subject random smooths. The model includes correction for autocorrelation. Parametric coefficient LANGUAGE = Spanish estimates the overall significance in values of the cABR signal between English and Spanish (expectedly non-significant as there is no reason to expect that amplitude or base level in one of the groups would be different). The smooth term s(Time):LANGUAGE = Spanish estimates the overall significance of the difference smooth for English and Spanish and thus reveal whether the trajectories (smooths) in cABR activity between English and Spanish differ significantly. The actual difference smooth is plotted in Figure 1j.

## 1.4 Linear models

|                                       | Estimate | Std. Error | t value | Pr(> t ) |
|---------------------------------------|----------|------------|---------|----------|
| (Intercept)=Period1, LanguageEnglish  | -0.0010  | 0.0002     | -4.78   | 0.0000   |
| LanguageSpanish                       | -0.0004  | 0.0003     | -1.59   | 0.1125   |
| Place0                                | 0.0010   | 0.0003     | 3.15    | 0.0017   |
| Place2                                | 0.0004   | 0.0003     | 1.44    | 0.1505   |
| Place3                                | 0.0006   | 0.0003     | 2.14    | 0.0330   |
| Place4                                | 0.0009   | 0.0003     | 3.24    | 0.0013   |
| Place5                                | 0.0010   | 0.0003     | 3.41    | 0.0007   |
| Place6                                | 0.0006   | 0.0003     | 1.88    | 0.0603   |
| Place7                                | 0.0013   | 0.0003     | 3.80    | 0.0002   |
| Place8                                | 0.0009   | 0.0005     | 1.74    | 0.0830   |
| Place9                                | 0.0007   | 0.0007     | 0.93    | 0.3512   |
| Place10                               | 0.0009   | 0.0007     | 1.20    | 0.2297   |
| Place11                               | 0.0011   | 0.0008     | 1.38    | 0.1697   |
| Place12                               | 0.0013   | 0.0008     | 1.64    | 0.1014   |
| Replication11                         | -0.0008  | 0.0002     | -3.92   | 0.0001   |
| LanguageSpanish:Place0                | 0.0003   | 0.0004     | 0.73    | 0.4656   |
| LanguageSpanish:Place2                | -0.0003  | 0.0004     | -0.67   | 0.5043   |
| LanguageSpanish:Place3                | 0.0000   | 0.0004     | 0.05    | 0.9623   |
| LanguageSpanish:Place4                | -0.0005  | 0.0004     | -1.31   | 0.1901   |
| LanguageSpanish:Place5                | -0.0009  | 0.0004     | -2.22   | 0.0269   |
| LanguageSpanish:Place6                | 0.0009   | 0.0004     | 2.10    | 0.0363   |
| LanguageSpanish:Place7                | -0.0004  | 0.0005     | -0.83   | 0.4050   |
| LanguageSpanish:Place8                | 0.0002   | 0.0007     | 0.32    | 0.7504   |
| LanguageSpanish:Place9                | 0.0006   | 0.0009     | 0.60    | 0.5511   |
| LanguageSpanish:Place10               | 0.0019   | 0.0011     | 1.66    | 0.0979   |
| LanguageSpanish:Place11               | -0.0006  | 0.0012     | -0.47   | 0.6360   |
| LanguageSpanish:Place12               | -0.0005  | 0.0018     | -0.30   | 0.7609   |
| LanguageSpanish:Replication11         | 0.0007   | 0.0003     | 2.58    | 0.0101   |
| Place0:Replication11                  | 0.0006   | 0.0003     | 1.84    | 0.0657   |
| Place2:Replication11                  | 0.0009   | 0.0003     | 3.08    | 0.0022   |
| Place3:Replication11                  | 0.0006   | 0.0003     | 2.25    | 0.0248   |
| Place4:Replication11                  | 0.0007   | 0.0003     | 2.39    | 0.0170   |
| Place5:Replication11                  | 0.0008   | 0.0003     | 2.70    | 0.0071   |
| Place6:Replication11                  | 0.0006   | 0.0003     | 2.01    | 0.0449   |
| Place7:Replication11                  | 0.0006   | 0.0003     | 1.92    | 0.0548   |
| Place8:Replication11                  | 0.0010   | 0.0005     | 1.89    | 0.0593   |
| Place9:Replication11                  | 0.0010   | 0.0007     | 1.35    | 0.1773   |
| Place10:Replication11                 | 0.0010   | 0.0007     | 1.33    | 0.1837   |
| Place11:Replication11                 | 0.0007   | 0.0008     | 0.93    | 0.3547   |
| Place12:Replication11                 | 0.0009   | 0.0008     | 1.20    | 0.2315   |
| LanguageSpanish:Place0:Replication11  | -0.0003  | 0.0004     | -0.68   | 0.4993   |
| LanguageSpanish:Place2:Replication11  | -0.0009  | 0.0004     | -2.21   | 0.0278   |
| LanguageSpanish:Place3:Replication11  | -0.0006  | 0.0004     | -1.52   | 0.1285   |
| LanguageSpanish:Place4:Replication11  | -0.0014  | 0.0004     | -3.42   | 0.0007   |
| LanguageSpanish:Place5:Replication11  | -0.0017  | 0.0004     | -4.21   | 0.0000   |
| LanguageSpanish:Place6:Replication11  | -0.0007  | 0.0004     | -1.67   | 0.0950   |
| LanguageSpanish:Place7:Replication11  | -0.0011  | 0.0005     | -2.20   | 0.0285   |
| LanguageSpanish:Place8:Replication11  | -0.0011  | 0.0007     | -1.56   | 0.1186   |
| LanguageSpanish:Place9:Replication11  | -0.0008  | 0.0009     | -0.87   | 0.3831   |
| LanguageSpanish:Place10:Replication11 | -0.0025  | 0.0011     | -2.21   | 0.0273   |
| LanguageSpanish:Place11:Replication11 | 0.0000   | 0.0012     | 0.03    | 0.9766   |

**Table S3.** Estimates of the linear model described in Section 4.1 (main paper) with three predictors (LANGUAGE, nTH PERIOD, and REPLICATION with all two-way and three-way interactions) for the Generator network.

|                                       | Estimate | Std. Error | t value | Pr(> t ) |
|---------------------------------------|----------|------------|---------|----------|
| (Intercept)=Period1, LanguageEnglish  | -0.0001  | 0.0001     | -0.94   | 0.3497   |
| LanguageSpanish                       | -0.0000  | 0.0002     | -0.05   | 0.9601   |
| Place0                                | 0.0005   | 0.0002     | 2.29    | 0.0227   |
| Place2                                | -0.0004  | 0.0002     | -2.02   | 0.0441   |
| Place3                                | -0.0001  | 0.0002     | -0.49   | 0.6273   |
| Place4                                | -0.0001  | 0.0002     | -0.36   | 0.7177   |
| Place5                                | 0.0001   | 0.0002     | 0.35    | 0.7247   |
| Place6                                | -0.0001  | 0.0002     | -0.64   | 0.5257   |
| Place7                                | -0.0001  | 0.0002     | -0.58   | 0.5624   |
| Place8                                | 0.0001   | 0.0003     | 0.35    | 0.7287   |
| Place9                                | -0.0000  | 0.0005     | -0.10   | 0.9208   |
| Place10                               | 0.0003   | 0.0005     | 0.75    | 0.4510   |
| Place11                               | 0.0000   | 0.0005     | 0.08    | 0.9331   |
| Place12                               | -0.0002  | 0.0005     | -0.41   | 0.6834   |
| Replication11                         | -0.0003  | 0.0001     | -2.34   | 0.0195   |
| LanguageSpanish:Place0                | 0.0000   | 0.0003     | 0.03    | 0.9739   |
| LanguageSpanish:Place2                | 0.0003   | 0.0003     | 1.19    | 0.2343   |
| LanguageSpanish:Place3                | -0.0006  | 0.0003     | -2.25   | 0.0248   |
| LanguageSpanish:Place4                | -0.0000  | 0.0003     | -0.03   | 0.9729   |
| LanguageSpanish:Place5                | -0.0001  | 0.0003     | -0.49   | 0.6212   |
| LanguageSpanish:Place6                | 0.0008   | 0.0003     | 2.96    | 0.0032   |
| LanguageSpanish:Place7                | 0.0001   | 0.0003     | 0.28    | 0.7768   |
| LanguageSpanish:Place8                | -0.0000  | 0.0004     | -0.01   | 0.9955   |
| LanguageSpanish:Place9                | 0.0001   | 0.0006     | 0.12    | 0.9050   |
| LanguageSpanish:Place10               | 0.0011   | 0.0007     | 1.57    | 0.1162   |
| LanguageSpanish:Place11               | -0.0009  | 0.0008     | -1.23   | 0.2205   |
| LanguageSpanish:Place12               | 0.0007   | 0.0011     | 0.62    | 0.5364   |
| LanguageSpanish:Replication11         | -0.0000  | 0.0002     | -0.13   | 0.8998   |
| Place0:Replication11                  | 0.0002   | 0.0002     | 1.18    | 0.2379   |
| Place2:Replication11                  | 0.0003   | 0.0002     | 1.42    | 0.1560   |
| Place3:Replication11                  | 0.0001   | 0.0002     | 0.35    | 0.7246   |
| Place4:Replication11                  | -0.0000  | 0.0002     | -0.02   | 0.9816   |
| Place5:Replication11                  | -0.0000  | 0.0002     | -0.24   | 0.8091   |
| Place6:Replication11                  | 0.0001   | 0.0002     | 0.33    | 0.7442   |
| Place7:Replication11                  | 0.0000   | 0.0002     | 0.19    | 0.8462   |
| Place8:Replication11                  | 0.0002   | 0.0003     | 0.60    | 0.5470   |
| Place9:Replication11                  | 0.0001   | 0.0005     | 0.11    | 0.9095   |
| Place10:Replication11                 | -0.0004  | 0.0005     | -0.81   | 0.4208   |
| Place11:Replication11                 | -0.0001  | 0.0005     | -0.14   | 0.8863   |
| Place12:Replication11                 | 0.0001   | 0.0005     | 0.29    | 0.7740   |
| LanguageSpanish:Place0:Replication11  | 0.0003   | 0.0003     | 0.88    | 0.3769   |
| LanguageSpanish:Place2:Replication11  | 0.0002   | 0.0003     | 0.81    | 0.4198   |
| LanguageSpanish:Place3:Replication11  | 0.0004   | 0.0003     | 1.48    | 0.1384   |
| LanguageSpanish:Place4:Replication11  | 0.0006   | 0.0003     | 2.31    | 0.0215   |
| LanguageSpanish:Place5:Replication11  | 0.0006   | 0.0003     | 2.27    | 0.0236   |
| LanguageSpanish:Place6:Replication11  | 0.0011   | 0.0003     | 3.76    | 0.0002   |
| LanguageSpanish:Place7:Replication11  | 0.0005   | 0.0003     | 1.51    | 0.1308   |
| LanguageSpanish:Place8:Replication11  | 0.0000   | 0.0004     | 0.06    | 0.9537   |
| LanguageSpanish:Place9:Replication11  | 0.0002   | 0.0006     | 0.35    | 0.7262   |
| LanguageSpanish:Place10:Replication11 | -0.0005  | 0.0007     | -0.65   | 0.5168   |
| LanguageSpanish:Place11:Replication11 | 0.0015   | 0.0008     | 1.98    | 0.0483   |

**Table S4.** Estimates of the linear model described in Section 4.2 (main paper) with three predictors (LANGUAGE, nTH PERIOD, and REPLICATION with all two-way and three-way interactions) for the Discriminator network.

## 1.5 Individual replications

### 1.5.1 Generator

In the Generator network, peak latency differs significantly in periods 2, 4, 5 and 7 in the first replication and in periods 1 and 10 in the second replication (unadjusted). If adjusted with FDR, period 4 and 5 are significant in the first replication, and period 1 in the second replication (Table S5).

| Place | Replication I | contrast          | estimate | SE     | df  | t.ratio | p.value |
|-------|---------------|-------------------|----------|--------|-----|---------|---------|
| 0     | 1             | English - Spanish | -0.0003  | 0.0005 | 517 | -0.612  | 0.7588  |
| 1     | 1             | English - Spanish | -0.0003  | 0.0004 | 517 | -0.718  | 0.7237  |
| 2     | 1             | English - Spanish | 0.0009   | 0.0004 | 517 | 2.220   | 0.1164  |
| 3     | 1             | English - Spanish | 0.0003   | 0.0004 | 517 | 0.785   | 0.7029  |
| 4     | 1             | English - Spanish | 0.0016   | 0.0004 | 517 | 4.150   | 0.0005  |
| 5     | 1             | English - Spanish | 0.0023   | 0.0004 | 517 | 5.897   | <.0001  |
| 6     | 1             | English - Spanish | -0.0005  | 0.0004 | 517 | -1.056  | 0.6884  |
| 7     | 1             | English - Spanish | 0.0012   | 0.0005 | 517 | 2.317   | 0.1088  |
| 8     | 1             | English - Spanish | 0.0006   | 0.0010 | 517 | 0.591   | 0.7588  |
| 9     | 1             | English - Spanish | -0.0000  | 0.0014 | 517 | -0.015  | 1.0000  |
| 10    | 1             | English - Spanish | 0.0004   | 0.0017 | 517 | 0.204   | 0.9611  |
| 11    | 1             | English - Spanish | 0.0002   | 0.0017 | 517 | 0.142   | 0.9611  |
| 12    | 1             | English - Spanish | 0.0003   | 0.0017 | 517 | 0.152   | 0.9611  |
| 0     | 2             | English - Spanish | 0.0005   | 0.0005 | 517 | 1.127   | 0.6763  |
| 1     | 2             | English - Spanish | 0.0012   | 0.0004 | 517 | 2.890   | 0.0348  |
| 2     | 2             | English - Spanish | 0.0006   | 0.0004 | 517 | 1.383   | 0.5548  |
| 3     | 2             | English - Spanish | 0.0006   | 0.0004 | 517 | 1.372   | 0.5548  |
| 4     | 2             | English - Spanish | 0.0003   | 0.0004 | 517 | 0.791   | 0.7029  |
| 5     | 2             | English - Spanish | 0.0004   | 0.0004 | 517 | 0.855   | 0.7029  |
| 6     | 2             | English - Spanish | -0.0005  | 0.0005 | 517 | -0.950  | 0.7029  |
| 7     | 2             | English - Spanish | 0.0005   | 0.0006 | 517 | 0.806   | 0.7029  |
| 8     | 2             | English - Spanish | -0.0001  | 0.0008 | 517 | -0.164  | 0.9611  |
| 9     | 2             | English - Spanish | -0.0002  | 0.0011 | 517 | -0.184  | 0.9611  |
| 10    | 2             | English - Spanish | -0.0033  | 0.0014 | 517 | -2.367  | 0.1088  |
| 11    | 2             | English - Spanish | 0.0018   | 0.0015 | 517 | 1.174   | 0.6763  |
| 12    | 2             | English - Spanish |          |        |     |         | NA      |

P value adjustment: fdr method for 26 tests

**Table S5.** Pairwise contrasts in peak timing difference between English and Spanish across replications in the Generator network with FDR adjustment (with *emmeans* package by<sup>4</sup>). The burst is marked by the 0th period. The 12th period is not estimated due to lack of data.

### 1.5.2 Discriminator

In the Discriminator, periods 4 and 6 are significant in the first replication and periods 3, 4, 5 and 11 in the second replication (unadjusted). If adjusted with FDR, period 6 is significant in the first replication and period 3 in the second replication (Table S6).

| Place | Replication l | contrast          | estimate | SE     | df  | t.ratio | p.value |
|-------|---------------|-------------------|----------|--------|-----|---------|---------|
| 0     | 1             | English - Spanish | -0.0002  | 0.0003 | 517 | -0.726  | 0.8601  |
| 1     | 1             | English - Spanish | 0.0000   | 0.0002 | 517 | 0.127   | 1.0000  |
| 2     | 1             | English - Spanish | -0.0005  | 0.0002 | 517 | -1.915  | 0.2044  |
| 3     | 1             | English - Spanish | 0.0002   | 0.0002 | 517 | 0.908   | 0.7891  |
| 4     | 1             | English - Spanish | -0.0005  | 0.0002 | 517 | -2.211  | 0.1224  |
| 5     | 1             | English - Spanish | -0.0004  | 0.0003 | 517 | -1.697  | 0.2606  |
| 6     | 1             | English - Spanish | -0.0018  | 0.0003 | 517 | -6.586  | <.0001  |
| 7     | 1             | English - Spanish | -0.0005  | 0.0003 | 517 | -1.595  | 0.2892  |
| 8     | 1             | English - Spanish | 0.0000   | 0.0006 | 517 | 0.013   | 1.0000  |
| 9     | 1             | English - Spanish | -0.0002  | 0.0009 | 517 | -0.273  | 1.0000  |
| 10    | 1             | English - Spanish | -0.0006  | 0.0011 | 517 | -0.580  | 0.8601  |
| 11    | 1             | English - Spanish | -0.0005  | 0.0011 | 517 | -0.484  | 0.9081  |
| 12    | 1             | English - Spanish | -0.0007  | 0.0011 | 517 | -0.606  | 0.8601  |
| 0     | 2             | English - Spanish | 0.0002   | 0.0003 | 517 | 0.741   | 0.8601  |
| 1     | 2             | English - Spanish | -0.0000  | 0.0003 | 517 | -0.053  | 1.0000  |
| 2     | 2             | English - Spanish | -0.0001  | 0.0003 | 517 | -0.428  | 0.9151  |
| 3     | 2             | English - Spanish | 0.0009   | 0.0003 | 517 | 3.635   | 0.0040  |
| 4     | 2             | English - Spanish | 0.0006   | 0.0003 | 517 | 2.200   | 0.1224  |
| 5     | 2             | English - Spanish | 0.0007   | 0.0003 | 517 | 2.561   | 0.0813  |
| 6     | 2             | English - Spanish | 0.0002   | 0.0003 | 517 | 0.646   | 0.8601  |
| 7     | 2             | English - Spanish | 0.0004   | 0.0004 | 517 | 0.946   | 0.7891  |
| 8     | 2             | English - Spanish | 0.0000   | 0.0005 | 517 | 0.029   | 1.0000  |
| 9     | 2             | English - Spanish | 0.0001   | 0.0007 | 517 | 0.182   | 1.0000  |
| 10    | 2             | English - Spanish | -0.0016  | 0.0009 | 517 | -1.864  | 0.2044  |
| 11    | 2             | English - Spanish | 0.0024   | 0.0010 | 517 | 2.506   | 0.0813  |
| 12    | 2             | English - Spanish |          |        |     |         | NA      |

P value adjustment: fdr method for 26 tests

**Table S6.** Pairwise contrasts in peak timing difference between English and Spanish across replications in the Discriminator network with FDR adjustment (with *emmeans* package by<sup>4</sup>). The burst is marked by the 0th period. The 12th period is not estimated due to lack of data.

## 2 Without absolute values

| Contrast          | <i>n</i> th period | Estimate | SE     | df  | t.ratio | p.value |
|-------------------|--------------------|----------|--------|-----|---------|---------|
| English - Spanish | 0 (=burst)         | 0.0000   | 0.0004 | 514 | 0.02    | 0.981   |
| English - Spanish | 1                  | -0.0006  | 0.0003 | 514 | -1.91   | 0.056   |
| English - Spanish | 2                  | -0.0007  | 0.0003 | 514 | -2.06   | 0.040   |
| English - Spanish | 3                  | -0.0008  | 0.0003 | 514 | -2.54   | 0.011   |
| English - Spanish | 4                  | -0.0010  | 0.0003 | 514 | -2.83   | 0.005   |
| English - Spanish | 5                  | -0.0006  | 0.0004 | 514 | -1.63   | 0.104   |
| English - Spanish | 6                  | -0.0017  | 0.0004 | 514 | -4.13   | 0.000   |
| English - Spanish | 7                  | -0.0005  | 0.0005 | 514 | -1.09   | 0.278   |
| English - Spanish | 8                  | -0.0005  | 0.0008 | 514 | -0.70   | 0.485   |
| English - Spanish | 9                  | -0.0011  | 0.0011 | 514 | -1.00   | 0.318   |
| English - Spanish | 10                 | -0.0021  | 0.0013 | 514 | -1.63   | 0.104   |
| English - Spanish | 11                 | -0.0012  | 0.0014 | 514 | -0.89   | 0.375   |

**Table S7.** Pairwise contrasts in peak timing difference between English and Spanish (pooled across replications) in the Generator network (with *emmeans* package<sup>4</sup>) if the waveforms are not converted absolute values. The burst is marked by the 0th period. The 12th period is not estimated due to lack of data.

| Contrast          | nth period | Estimate | SE     | df  | t.ratio | p.value |
|-------------------|------------|----------|--------|-----|---------|---------|
| English - Spanish | 0          | -0.0001  | 0.0003 | 514 | -0.33   | 0.745   |
| English - Spanish | 1          | -0.0007  | 0.0003 | 514 | -2.64   | 0.008   |
| English - Spanish | 2          | -0.0016  | 0.0003 | 514 | -5.64   | 0.000   |
| English - Spanish | 3          | -0.0004  | 0.0003 | 514 | -1.33   | 0.183   |
| English - Spanish | 4          | -0.0019  | 0.0003 | 514 | -6.77   | 0.000   |
| English - Spanish | 5          | -0.0018  | 0.0003 | 514 | -6.10   | 0.000   |
| English - Spanish | 6          | -0.0020  | 0.0003 | 514 | -5.93   | 0.000   |
| English - Spanish | 7          | -0.0012  | 0.0004 | 514 | -2.87   | 0.004   |
| English - Spanish | 8          | -0.0007  | 0.0006 | 514 | -1.18   | 0.239   |
| English - Spanish | 9          | -0.0010  | 0.0009 | 514 | -1.14   | 0.253   |
| English - Spanish | 10         | -0.0018  | 0.0011 | 514 | -1.66   | 0.097   |
| English - Spanish | 11         | -0.0013  | 0.0011 | 514 | -1.13   | 0.259   |

**Table S8.** Pairwise contrasts in peak timing difference between English and Spanish (pooled across replications) in the Discriminator network (with *emmeans* package<sup>4</sup>) if the waveforms are not converted to absolute values. The burst is marked by the 0th period. The 12th period is not estimated due to lack of data.

|                                        | Estimate | Std. Error | t value | Pr(> t ) |
|----------------------------------------|----------|------------|---------|----------|
| (Intercept)=Period 1, LanguageEnglish  | -0.0010  | 0.0002     | -4.03   | 0.0001   |
| LanguageSpanish                        | 0.0006   | 0.0003     | 1.91    | 0.0561   |
| Period0                                | 0.0009   | 0.0004     | 2.47    | 0.0137   |
| Period2                                | 0.0003   | 0.0003     | 0.89    | 0.3729   |
| Period3                                | 0.0006   | 0.0003     | 1.77    | 0.0778   |
| Period4                                | 0.0009   | 0.0003     | 2.73    | 0.0065   |
| Period5                                | 0.0010   | 0.0003     | 2.76    | 0.0060   |
| Period6                                | 0.0004   | 0.0004     | 1.10    | 0.2731   |
| Period7                                | 0.0012   | 0.0004     | 2.99    | 0.0030   |
| Period8                                | 0.0007   | 0.0006     | 1.17    | 0.2444   |
| Period9                                | 0.0007   | 0.0008     | 0.79    | 0.4314   |
| Period10                               | 0.0005   | 0.0008     | 0.56    | 0.5787   |
| Period11                               | 0.0011   | 0.0009     | 1.16    | 0.2464   |
| Period12                               | 0.0013   | 0.0009     | 1.38    | 0.1667   |
| Replication11                          | -0.0008  | 0.0002     | -3.31   | 0.0010   |
| LanguageSpanish:Period0                | -0.0006  | 0.0005     | -1.22   | 0.2212   |
| LanguageSpanish:Period2                | 0.0000   | 0.0005     | 0.10    | 0.9188   |
| LanguageSpanish:Period3                | 0.0002   | 0.0005     | 0.43    | 0.6647   |
| LanguageSpanish:Period4                | 0.0003   | 0.0005     | 0.67    | 0.5047   |
| LanguageSpanish:Period5                | -0.0001  | 0.0005     | -0.13   | 0.8942   |
| LanguageSpanish:Period6                | 0.0010   | 0.0005     | 1.95    | 0.0514   |
| LanguageSpanish:Period7                | -0.0001  | 0.0006     | -0.18   | 0.8574   |
| LanguageSpanish:Period8                | -0.0001  | 0.0008     | -0.14   | 0.8897   |
| LanguageSpanish:Period9                | 0.0004   | 0.0011     | 0.38    | 0.7075   |
| LanguageSpanish:Period10               | 0.0015   | 0.0014     | 1.11    | 0.2682   |
| LanguageSpanish:Period11               | 0.0006   | 0.0014     | 0.41    | 0.6831   |
| LanguageSpanish:Period12               | 0.0002   | 0.0021     | 0.11    | 0.9123   |
| LanguageSpanish:Replication11          | 0.0009   | 0.0003     | 2.82    | 0.0050   |
| Period0:Replication11                  | 0.0005   | 0.0004     | 1.37    | 0.1704   |
| Period2:Replication11                  | 0.0008   | 0.0003     | 2.27    | 0.0233   |
| Period3:Replication11                  | 0.0006   | 0.0003     | 1.86    | 0.0631   |
| Period4:Replication11                  | 0.0007   | 0.0003     | 2.02    | 0.0439   |
| Period5:Replication11                  | 0.0008   | 0.0003     | 2.30    | 0.0218   |
| Period6:Replication11                  | 0.0007   | 0.0004     | 1.98    | 0.0478   |
| Period7:Replication11                  | 0.0006   | 0.0004     | 1.37    | 0.1725   |
| Period8:Replication11                  | 0.0009   | 0.0006     | 1.43    | 0.1531   |
| Period9:Replication11                  | 0.0010   | 0.0008     | 1.14    | 0.2548   |
| Period10:Replication11                 | 0.0013   | 0.0008     | 1.58    | 0.1142   |
| Period11:Replication11                 | 0.0007   | 0.0009     | 0.78    | 0.4347   |
| Period12:Replication11                 | 0.0009   | 0.0009     | 1.01    | 0.3125   |
| LanguageSpanish:Period0:Replication11  | -0.0005  | 0.0005     | -0.87   | 0.3839   |
| LanguageSpanish:Period2:Replication11  | -0.0007  | 0.0005     | -1.54   | 0.1231   |
| LanguageSpanish:Period3:Replication11  | -0.0007  | 0.0005     | -1.57   | 0.1174   |
| LanguageSpanish:Period4:Replication11  | -0.0008  | 0.0005     | -1.72   | 0.0866   |
| LanguageSpanish:Period5:Replication11  | -0.0013  | 0.0005     | -2.59   | 0.0099   |
| LanguageSpanish:Period6:Replication11  | -0.0010  | 0.0005     | -1.91   | 0.0565   |
| LanguageSpanish:Period7:Replication11  | -0.0003  | 0.0006     | -0.56   | 0.5788   |
| LanguageSpanish:Period8:Replication11  | -0.0006  | 0.0008     | -0.77   | 0.4414   |
| LanguageSpanish:Period9:Replication11  | -0.0016  | 0.0011     | -1.48   | 0.1395   |
| LanguageSpanish:Period10:Replication11 | -0.0028  | 0.0014     | -2.09   | 0.0371   |
| LanguageSpanish:Period11:Replication11 | -0.0005  | 0.0014     | -0.34   | 0.7316   |

**Table S9.** Estimates of the linear model described in Section 4.1 (main paper) with three predictors (LANGUAGE, NTH PERIOD, and REPLICATION with all two-way and three-way interactions) for the Generator network if the waveforms are not converted to absolute values.

|                                        | Estimate | Std. Error | t value | Pr(> t ) |
|----------------------------------------|----------|------------|---------|----------|
| (Intercept)=Period1, LanguageEnglish   | -0.0001  | 0.0002     | -0.60   | 0.5485   |
| LanguageSpanish                        | 0.0007   | 0.0003     | 2.64    | 0.0084   |
| Period0                                | 0.0004   | 0.0003     | 1.25    | 0.2133   |
| Period2                                | -0.0005  | 0.0003     | -1.63   | 0.1027   |
| Period3                                | -0.0001  | 0.0003     | -0.36   | 0.7221   |
| Period4                                | -0.0001  | 0.0003     | -0.23   | 0.8166   |
| Period5                                | 0.0000   | 0.0003     | 0.12    | 0.9066   |
| Period6                                | -0.0003  | 0.0003     | -1.00   | 0.3201   |
| Period7                                | -0.0002  | 0.0003     | -0.53   | 0.5963   |
| Period8                                | -0.0001  | 0.0005     | -0.14   | 0.8912   |
| Period9                                | -0.0000  | 0.0007     | -0.06   | 0.9492   |
| Period10                               | -0.0000  | 0.0007     | -0.07   | 0.9476   |
| Period11                               | 0.0000   | 0.0008     | 0.05    | 0.9570   |
| Period12                               | -0.0002  | 0.0008     | -0.26   | 0.7937   |
| Replication11                          | -0.0003  | 0.0002     | -1.50   | 0.1334   |
| LanguageSpanish:Period0                | -0.0006  | 0.0004     | -1.41   | 0.1583   |
| LanguageSpanish:Period2                | 0.0008   | 0.0004     | 2.12    | 0.0348   |
| LanguageSpanish:Period3                | -0.0004  | 0.0004     | -0.93   | 0.3503   |
| LanguageSpanish:Period4                | 0.0012   | 0.0004     | 2.96    | 0.0032   |
| LanguageSpanish:Period5                | 0.0011   | 0.0004     | 2.61    | 0.0093   |
| LanguageSpanish:Period6                | 0.0013   | 0.0004     | 2.88    | 0.0042   |
| LanguageSpanish:Period7                | 0.0004   | 0.0005     | 0.89    | 0.3757   |
| LanguageSpanish:Period8                | 0.0000   | 0.0007     | 0.00    | 0.9963   |
| LanguageSpanish:Period9                | 0.0003   | 0.0009     | 0.29    | 0.7703   |
| LanguageSpanish:Period10               | 0.0011   | 0.0011     | 0.96    | 0.3368   |
| LanguageSpanish:Period11               | 0.0006   | 0.0012     | 0.47    | 0.6382   |
| LanguageSpanish:Period12               | 0.0016   | 0.0018     | 0.93    | 0.3513   |
| LanguageSpanish:Replication11          | 0.0004   | 0.0003     | 1.29    | 0.1973   |
| Period0:Replication11                  | 0.0002   | 0.0003     | 0.54    | 0.5907   |
| Period2:Replication11                  | 0.0002   | 0.0003     | 0.57    | 0.5688   |
| Period3:Replication11                  | 0.0001   | 0.0003     | 0.18    | 0.8558   |
| Period4:Replication11                  | -0.0000  | 0.0003     | -0.01   | 0.9882   |
| Period5:Replication11                  | -0.0000  | 0.0003     | -0.05   | 0.9619   |
| Period6:Replication11                  | 0.0002   | 0.0003     | 0.55    | 0.5799   |
| Period7:Replication11                  | -0.0001  | 0.0003     | -0.15   | 0.8773   |
| Period8:Replication11                  | 0.0001   | 0.0005     | 0.19    | 0.8491   |
| Period9:Replication11                  | 0.0001   | 0.0007     | 0.07    | 0.9419   |
| Period10:Replication11                 | 0.0000   | 0.0007     | 0.03    | 0.9738   |
| Period11:Replication11                 | -0.0001  | 0.0008     | -0.09   | 0.9269   |
| Period12:Replication11                 | 0.0001   | 0.0008     | 0.18    | 0.8539   |
| LanguageSpanish:Period0:Replication11  | -0.0001  | 0.0004     | -0.18   | 0.8596   |
| LanguageSpanish:Period2:Replication11  | 0.0001   | 0.0004     | 0.16    | 0.8735   |
| LanguageSpanish:Period3:Replication11  | 0.0004   | 0.0004     | 1.14    | 0.2558   |
| LanguageSpanish:Period4:Replication11  | 0.0010   | 0.0004     | 2.45    | 0.0146   |
| LanguageSpanish:Period5:Replication11  | 0.0009   | 0.0004     | 2.12    | 0.0343   |
| LanguageSpanish:Period6:Replication11  | 0.0006   | 0.0004     | 1.41    | 0.1597   |
| LanguageSpanish:Period7:Replication11  | 0.0008   | 0.0005     | 1.56    | 0.1183   |
| LanguageSpanish:Period8:Replication11  | 0.0003   | 0.0007     | 0.45    | 0.6551   |
| LanguageSpanish:Period9:Replication11  | -0.0008  | 0.0009     | -0.85   | 0.3963   |
| LanguageSpanish:Period10:Replication11 | -0.0009  | 0.0011     | -0.83   | 0.4056   |
| LanguageSpanish:Period11:Replication11 | 0.0008   | 0.0012     | 0.68    | 0.4941   |

**Table S10.** Estimates of the linear model described in Section 4.2 (main paper) with three predictors (LANGUAGE, nTH PERIOD, and REPLICATION with all two-way and three-way interactions) for the Discriminator network if the waveforms are not converted to absolute values.

## 2.1 Individual replications without absolute values

### 2.1.1 Generator

In the Generator network, peak latency differs significantly in periods 1, 3, 4, 6 in the first replication and in periods 6 and 10 in the second replication (unadjusted). If adjusted with FDR, period 1 and 6 are significant in the first replication, and period 6 in the second replication (Table S11).



| Period | Replication | contrast          | estimate | SE     | df  | t.ratio | p.value |
|--------|-------------|-------------------|----------|--------|-----|---------|---------|
| 0      | 1           | English - Spanish | -0.0005  | 0.0006 | 514 | -0.797  | 0.6516  |
| 1      | 1           | English - Spanish | -0.0016  | 0.0005 | 514 | -3.419  | 0.0177  |
| 2      | 1           | English - Spanish | -0.0009  | 0.0005 | 514 | -1.945  | 0.1944  |
| 3      | 1           | English - Spanish | -0.0010  | 0.0005 | 514 | -2.263  | 0.1043  |
| 4      | 1           | English - Spanish | -0.0011  | 0.0005 | 514 | -2.339  | 0.1025  |
| 5      | 1           | English - Spanish | -0.0003  | 0.0005 | 514 | -0.550  | 0.7569  |
| 6      | 1           | English - Spanish | -0.0016  | 0.0005 | 514 | -3.049  | 0.0314  |
| 7      | 1           | English - Spanish | -0.0011  | 0.0006 | 514 | -1.832  | 0.2197  |
| 8      | 1           | English - Spanish | -0.0008  | 0.0012 | 514 | -0.710  | 0.6907  |
| 9      | 1           | English - Spanish | -0.0004  | 0.0017 | 514 | -0.212  | 0.9407  |
| 10     | 1           | English - Spanish | -0.0002  | 0.0021 | 514 | -0.119  | 0.9543  |
| 11     | 1           | English - Spanish | -0.0017  | 0.0021 | 514 | -0.809  | 0.6516  |
| 12     | 1           | English - Spanish | -0.0018  | 0.0021 | 514 | -0.877  | 0.6516  |
| 0      | 2           | English - Spanish | 0.0005   | 0.0006 | 514 | 0.850   | 0.6516  |
| 1      | 2           | English - Spanish | 0.0003   | 0.0005 | 514 | 0.625   | 0.7285  |
| 2      | 2           | English - Spanish | -0.0005  | 0.0005 | 514 | -0.988  | 0.6474  |
| 3      | 2           | English - Spanish | -0.0006  | 0.0005 | 514 | -1.345  | 0.3881  |
| 4      | 2           | English - Spanish | -0.0008  | 0.0005 | 514 | -1.684  | 0.2413  |
| 5      | 2           | English - Spanish | -0.0009  | 0.0005 | 514 | -1.691  | 0.2413  |
| 6      | 2           | English - Spanish | -0.0017  | 0.0006 | 514 | -2.819  | 0.0434  |
| 7      | 2           | English - Spanish | 0.0001   | 0.0008 | 514 | 0.104   | 0.9543  |
| 8      | 2           | English - Spanish | -0.0002  | 0.0009 | 514 | -0.232  | 0.9407  |
| 9      | 2           | English - Spanish | -0.0017  | 0.0013 | 514 | -1.384  | 0.3881  |
| 10     | 2           | English - Spanish | -0.0040  | 0.0016 | 514 | -2.476  | 0.0885  |
| 11     | 2           | English - Spanish | -0.0008  | 0.0018 | 514 | -0.423  | 0.8328  |
| 12     | 2           | English - Spanish |          |        |     |         | NA      |

P-value adjustment: FDR method for 26 tests

**Table S11.** Pairwise contrasts in peak timing difference between English and Spanish across replications in the Generator network with FDR adjustment (with *emmeans* package by<sup>4</sup>) if the waveforms are not converted to absolute values. The burst is marked by the 0th period. The 12th period is not estimated due to lack of data.

### 2.1.2 Discriminator

In the Discriminator, periods 1-7 are significant in the first replication and periods 2 and 6 in the second replication (unadjusted). If adjusted with FDR, periods 1-7 are significant in the first replication and period 2 in the second replication (Table S12).

| Period | Replication | contrast          | estimate | SE     | df  | t.ratio | p.value |
|--------|-------------|-------------------|----------|--------|-----|---------|---------|
| 0      | 1           | English - Spanish | -0.0004  | 0.0005 | 514 | -0.801  | 0.5798  |
| 1      | 1           | English - Spanish | -0.0011  | 0.0004 | 514 | -2.843  | 0.0151  |
| 2      | 1           | English - Spanish | -0.0020  | 0.0004 | 514 | -5.168  | <.0001  |
| 3      | 1           | English - Spanish | -0.0012  | 0.0004 | 514 | -3.050  | 0.0104  |
| 4      | 1           | English - Spanish | -0.0032  | 0.0004 | 514 | -8.410  | <.0001  |
| 5      | 1           | English - Spanish | -0.0030  | 0.0004 | 514 | -7.716  | <.0001  |
| 6      | 1           | English - Spanish | -0.0030  | 0.0004 | 514 | -6.769  | <.0001  |
| 7      | 1           | English - Spanish | -0.0023  | 0.0005 | 514 | -4.433  | 0.0001  |
| 8      | 1           | English - Spanish | -0.0014  | 0.0010 | 514 | -1.438  | 0.2990  |
| 9      | 1           | English - Spanish | -0.0006  | 0.0014 | 514 | -0.414  | 0.8411  |
| 10     | 1           | English - Spanish | -0.0012  | 0.0017 | 514 | -0.721  | 0.6130  |
| 11     | 1           | English - Spanish | -0.0024  | 0.0017 | 514 | -1.422  | 0.2990  |
| 12     | 1           | English - Spanish | -0.0027  | 0.0017 | 514 | -1.592  | 0.2649  |
| 0      | 2           | English - Spanish | 0.0002   | 0.0005 | 514 | 0.354   | 0.8554  |
| 1      | 2           | English - Spanish | -0.0004  | 0.0004 | 514 | -0.937  | 0.5044  |
| 2      | 2           | English - Spanish | -0.0011  | 0.0004 | 514 | -2.854  | 0.0151  |
| 3      | 2           | English - Spanish | 0.0004   | 0.0004 | 514 | 1.099   | 0.4163  |
| 4      | 2           | English - Spanish | -0.0006  | 0.0004 | 514 | -1.404  | 0.2990  |
| 5      | 2           | English - Spanish | -0.0006  | 0.0004 | 514 | -1.306  | 0.3122  |
| 6      | 2           | English - Spanish | -0.0010  | 0.0005 | 514 | -2.001  | 0.1327  |
| 7      | 2           | English - Spanish | -0.0000  | 0.0006 | 514 | -0.065  | 0.9859  |
| 8      | 2           | English - Spanish | -0.0001  | 0.0008 | 514 | -0.093  | 0.9859  |
| 9      | 2           | English - Spanish | -0.0014  | 0.0011 | 514 | -1.354  | 0.3054  |
| 10     | 2           | English - Spanish | -0.0024  | 0.0014 | 514 | -1.768  | 0.2017  |
| 11     | 2           | English - Spanish | -0.0001  | 0.0015 | 514 | -0.084  | 0.9859  |
| 12     | 2           | English - Spanish |          |        |     |         | NA      |

P-value adjustment: FDR method for 26 tests

**Table S12.** Pairwise contrasts in peak timing difference between English and Spanish across replications in the Discriminator network with FDR adjustment (with *emmeans* package by<sup>4</sup>) if the waveforms are not converted to absolute values. The burst is marked by the 0th period. The 12th period is not estimated due to lack of data.

## References

1. Boersma, P. & Weenink, D. Praat: doing phonetics by computer [computer program]. version 5.4.06. Retrieved 21 February 2015 from <http://www.praat.org/> (2015).
2. Donahue, C., McAuley, J. J. & Puckette, M. S. Adversarial audio synthesis. In *7th International Conference on Learning Representations, ICLR 2019, New Orleans, LA, USA, May 6-9, 2019*, 1–16 (OpenReview.net, 2019).
3. Wood, S. N. Fast stable restricted maximum likelihood and marginal likelihood estimation of semiparametric generalized linear models. *J. Royal Stat. Soc. (B)* **73**, 3–36 (2011).
4. Lenth, R. *emmeans: Estimated Marginal Means, aka Least-Squares Means* (2018). R package version 1.3.0.
